# Supplementary material for: A rapid and eco-friendly isothermal amplification microdevice for multiplex detection of foodborne pathogens
Source: Royal Society of Chemistry journal article supplement (doi:10.1039/c8lc00424b), 2018-01-01
Supplement: c8lc00424b1.pdf [file c8lc00424b1.pdf]

**Electronic Supplementary Information (ESI)**

**A rapid and eco-friendly isothermal amplification microdevice for multiplex detection of foodborne pathogens**

Thi Ngoc Diep Trinh and Nae Yoon Lee\*

---

*<sup>a</sup> Department of BioNano Technology, Gachon University, 1342 Seongnam-daero, Sujeong-gu, Seongnam-si, Gyeonggi-do, 13120, Korea.*

*\*E-mail: nylee@gachon.ac.kr*

**Table S1.** The primer sequences used for loop-mediated isothermal amplification of four microorganisms

| Target gene                                      | Primer name                                                        | Primer sequence (5'-3')                                         |
|--------------------------------------------------|--------------------------------------------------------------------|-----------------------------------------------------------------|
| <i>invA</i> gene<br>( <i>Salmonella</i> )        | F3                                                                 | CCA ACA ATC CAT CAG CAA G                                       |
|                                                  | B3                                                                 | AGC ATA TGT TTT GTT TCC TGA A                                   |
|                                                  | FIP                                                                | AAC ACA TAG CCA AGC TCC CGC AGT CAG TAT TTC TGG GTA AC          |
|                                                  | BIP                                                                | GAA CGC GCT TGA TGA GCT TTC GAA ATA TTC ATT GAC GTT GC          |
|                                                  | LF                                                                 | GAG TTT CTC CCC CTC TTC ATG C                                   |
|                                                  | LB                                                                 | ACC ACT GTC TGG CGG TGA                                         |
|                                                  | <i>nuc</i> gene<br>( <i>S. aureus</i> )                            | F3                                                              |
| B3                                               |                                                                    | CTT TGT CAA ACT CGA CTT CAA                                     |
| FIP                                              |                                                                    | ATG TCA TTG GTT GAC CTT TGT ACA TAA ATT ACA TAA AGA ACC TGC GA  |
| BIP                                              |                                                                    | GTT GAT ACA CCT GAA ACA AAG CAT CAT TTT TTT CGT AAA TGC ACT TGC |
| LF                                               |                                                                    | CCG TAT CAC CAT CAA TCG CTT T                                   |
| LB                                               |                                                                    | AGG TGT AGA GAA ATA TGG TCC TGA                                 |
| <i>eaeA</i> gene<br>( <i>E. coli</i><br>O157:H7) |                                                                    | F3                                                              |
|                                                  | B3                                                                 | GGT AGC ATC ATC GAG AGG                                         |
|                                                  | FIP                                                                | CAT TCA AAA TCT CAA GAG CGA AGT TGA TTT ATG GTG TCT GTG GGA     |
|                                                  | BIP                                                                | CAA ACT TAT GGT TTG CAG AGA ATG GAA ACG TAA CGC TAA CAA CAG     |
|                                                  | LF                                                                 | AGA GTT ATC TGT CGG GAA TT                                      |
|                                                  | LB                                                                 | TGG CCC ATA TCT GTG CTA                                         |
|                                                  | Large subunit<br>ribosomal RNA<br>gene ( <i>C. polykrikoides</i> ) | F3                                                              |
| B3                                               |                                                                    | TCA CCA TCT TTC GGG TCC TA                                      |
| FIP                                              |                                                                    | AGC CCA AGC ACT CGC ACA TAT GGT TCT TTC CGA CCC GTC TTG         |
| BIP                                              |                                                                    | CAT GCG CGC AAC GAA AGT GAA CGT CTC GCA ATT GAT CAG T           |
| LF                                               |                                                                    | AGA CTC CTT GGT CCG TGT TT                                      |
| LB                                               |                                                                    | GCT GAG ATC TTT GCA CCA GCA                                     |

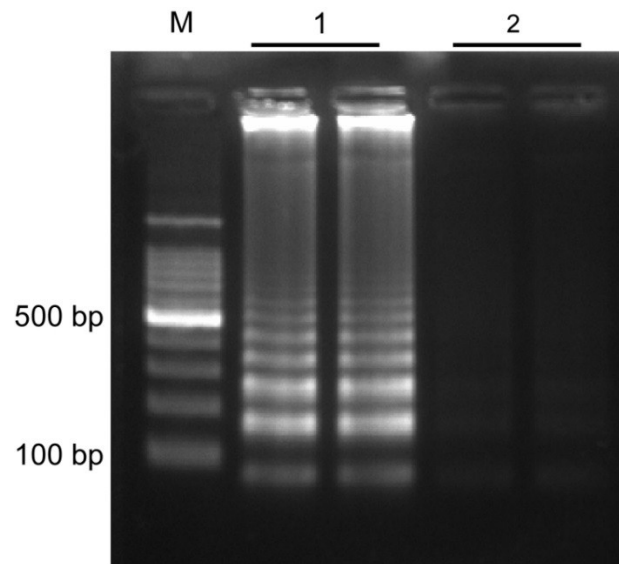

**Fig. S1** Evaluation of the reaction temperatures for LAMP. Lane M shows 100 bp DNA ladder. Lane 1 shows reaction performed at 65 °C. Lane 2 shows reaction performed at 60 °C.

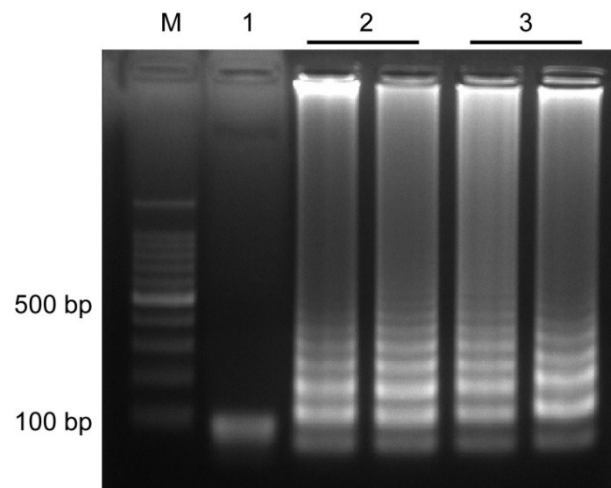

**Fig. S2** Evaluation of the reaction time when the reaction temperature was 65 °C. Lane M shows 100 bp DNA ladder. Lane 1 shows negative control result. Lane 2 shows the results when reactions were performed for 60 min. Lane 3 shows the results when reactions were performed for 30 min.

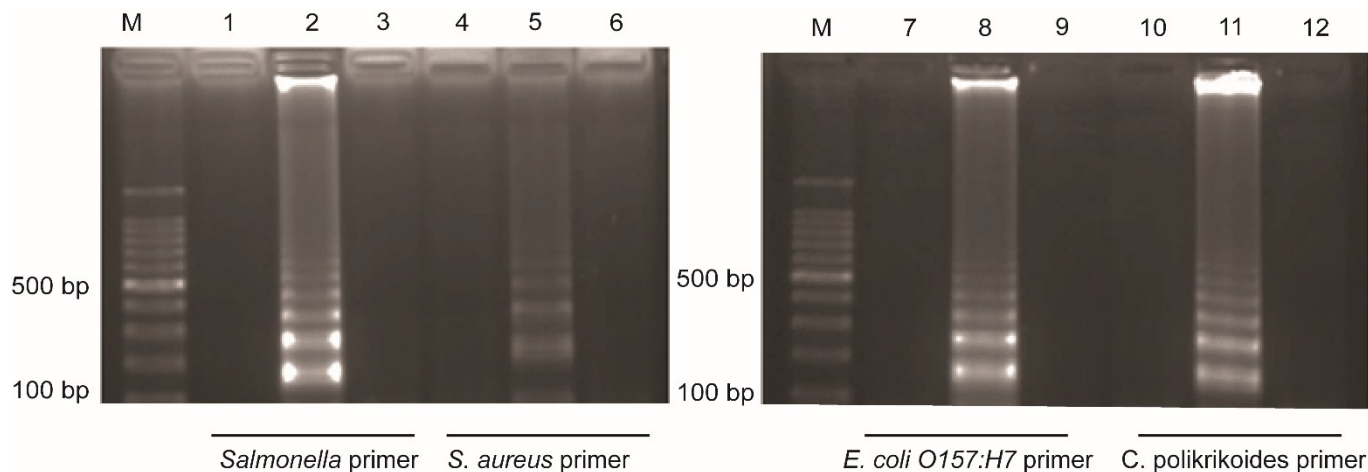

**Fig. S3** Results demonstrating specificity of LAMP primers. Lane M shows 100 bp DNA ladder. Lane 1 shows negative control result when *Salmonella* primer was used. Lane 2 shows the result when *Salmonella* template and its primers were used. Lane 3 shows the result when LAMP reaction was carried out using *Salmonella* spp. primer and mixed templates of *S. aureus*, *E.coli* O157:H7, and *C. polykrikoides*. Lane 4 shows negative control result when *S. aureus* primer was used. Lane 5 shows the result when *S. aureus* template and its primers were used. Lane 6 shows the result when LAMP reaction was carried out using *S. aureus* primer and mixed templates of *Salmonella*, *E.coli* O157:H7, and *C. polykrikoides*. Lane 7 shows negative control result when *E.coli* O157:H7 primer was used. Lane 8 shows the result when *E.coli* O157:H7 template and its primers were used. Lane 9 shows the result when LAMP reaction was carried out using *E.coli* O157:H7 primer and mixed templates of *Salmonella*, *S. aureus*, and *C. polykrikoides*. Lane 10 shows negative control result when *C. polykrikoides* primer was used. Lane 11 shows the result when *C. polykrikoides* template and its primers were used. Lane 12 shows the result when LAMP reaction was carried out using *C. polykrikoides* primer and mixed templates of *Salmonella*, *S. aureus*, and *E. coli* O157:H7.

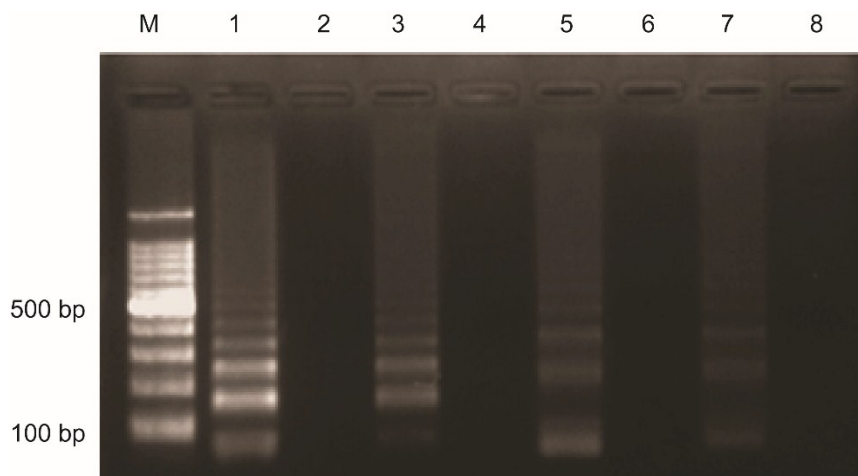

**Fig. S4** Gel electrophoresis results of on-chip LAMP for four target genes. Lane M shows 100 bp DNA ladder. Lane 1 shows the result from the positive chamber for *Salmonella* spp.. Lane 2 shows the result from the negative chamber for *Salmonella*.spp.. Lane 3 shows the result from the positive chamber for *E.coli* O157:H7. Lane 4 shows the result from the negative chamber for *E.coli* O157:H7. Lane 5 shows the result from the positive chamber for *C. Polykrikoides*. Lane 6 shows the result from the negative chamber for *C. polykrikoides*. Lane 7 shows the result from the positive chamber for *S. aureus*. Lane 8 shows the result from the negative chamber for *S. aureus*.

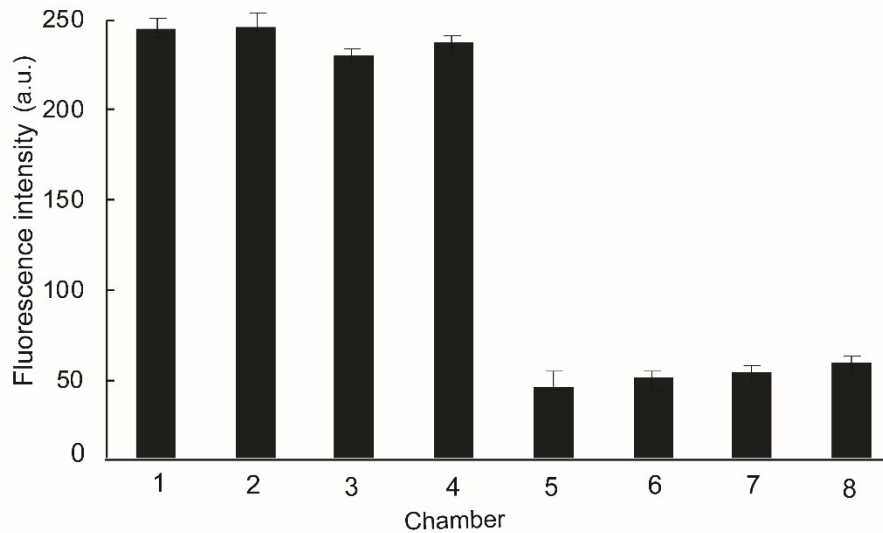

**Fig. S5** The intensity of the fluorescence signals for four target genes after the on-chip LAMP. “1” shows the result of positive chamber for *Salmonella* spp.. “2” shows the result of positive chamber for *E.coli* O157:H7. “3” shows the result of positive chamber for *C. polykrikoides*. “4” shows the result of positive chamber for *S. aureus*. “5” shows the result of negative chamber for *Salmonella* spp.. “6” shows the result of negative chamber for *E.coli* O157:H7. “8” shows the result of negative chamber for *C. Polykrikoides*. “8” shows the result of negative chamber for *S. aureus*.

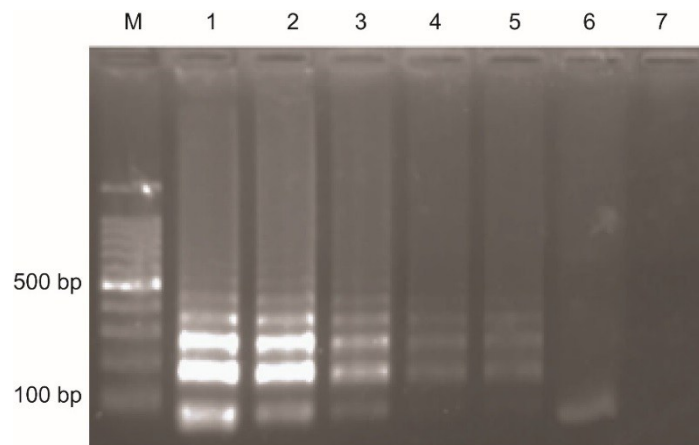

**Fig. S6** Gel electrophoresis results of LAMP showing sensitivity results when performing serial 10-fold dilutions of the initial genomic DNA of *E.coli* O157:H7 from 1335 ng  $\mu\text{L}^{-1}$  to 0.0133 ng  $\mu\text{L}^{-1}$ . Lane M shows 100 bp DNA ladder. Lanes 1–6 show the results of positive reactions containing DNA with initial genomic concentrations of 1335, 133.5, 13.35, 1.335, 0.1335, and 0.0133 ng  $\mu\text{L}^{-1}$ . Lane 7 shows the result of negative control.

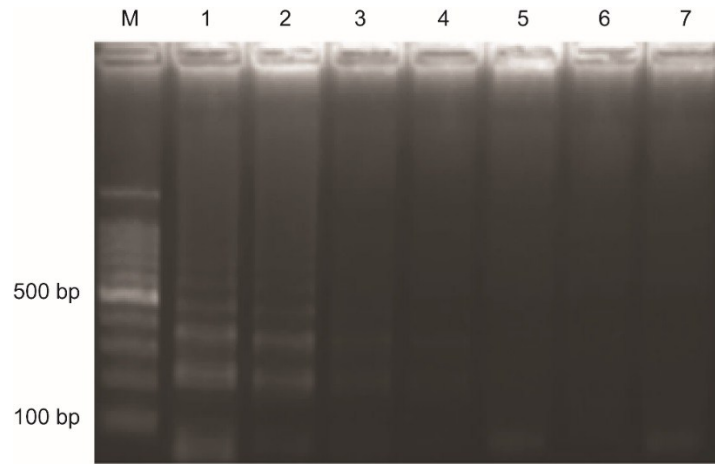

**Fig. S7** Gel electrophoresis results of LAMP showing sensitivity results when performing serial 10-fold dilutions of the initial genomic DNA of *S.aureus* from  $120 \text{ ng } \mu\text{L}^{-1}$  to  $0.0012 \text{ ng } \mu\text{L}^{-1}$ . Lane M shows 100 bp DNA ladder. Lanes 1–5 show the results of positive reactions containing DNA with initial genomic concentrations of 120, 12, 1.2, 0.12, and  $0.012 \text{ ng } \mu\text{L}^{-1}$ . Lanes 6 and 7 show the results of negative controls.

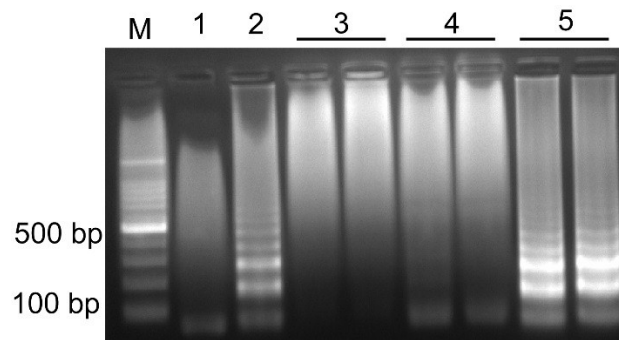

**Fig. S8** Gel electrophoresis results of LAMP obtained when *Salmonella* spp. was extracted from real milk sample using polydopamine-coated paper. Lane M shows 100 bp DNA ladder. Lane 1 shows negative control result. Lane 2 shows DNA extracted using a commercialized kit. Lane 3 show the results when milk solution was treated only with polydopamine-coated paper. Lane 4 show the results when the milk solution was treated only with heat. Lane 5 show the results when milk solution was treated with heat followed by polydopamine-coated paper.

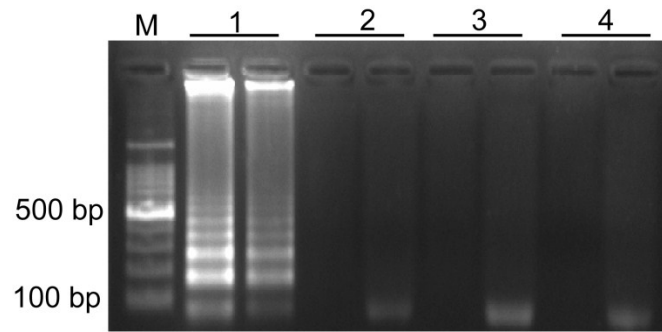

**Fig. S9** Gel electrophoresis results of LAMP reaction realized using the microdevice when the concentration of *Salmonella* spp. was  $7 \times 10^4$  CFU mL<sup>-1</sup>. Lane M shows 100 bp DNA ladder. Lane 1 show the results of chambers with *Salmonella* spp. primer set. Lane 2 show the results of chambers with *E. coli* O157:H7 primer set. Lane 3 show the results of chambers with *C. polykrikoides* primer set. Lane 4 show the results of chambers with *S. aureus* primer set.

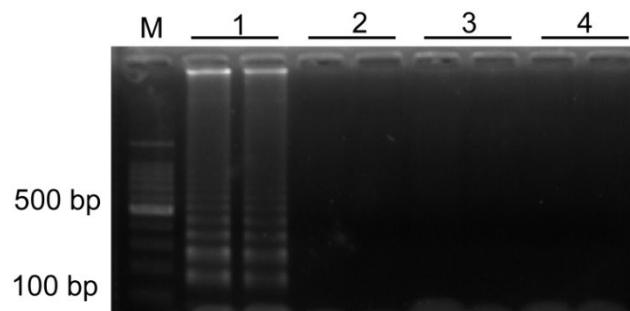

**Fig. S10** Gel electrophoresis results of LAMP reaction realized using the microdevice when the concentration of *Salmonella* spp. was  $1.7 \times 10^3$  CFU mL<sup>-1</sup>. Lane M shows 100 bp DNA ladder. Lane 1 show the results of chambers with *Salmonella* spp. primer set. Lane 2 show the results of chambers with *E. coli* O157:H7 primer set. Lane 3 show the results of chambers with *C. polykrikoides* primer set. Lane 4 show the results of chambers with *S. aureus* primer set.

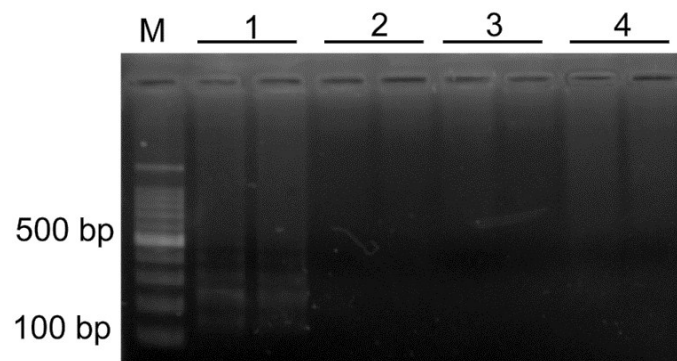

**Fig. S11** Gel electrophoresis results of LAMP reaction realized using the microdevice when the concentration of *Salmonella* spp. was  $1.7 \times 10^2$  CFU mL<sup>-1</sup>. Lane M shows 100 bp DNA ladder. Lane 1 show the results of chambers with *Salmonella* spp. primer set. Lane 2 show the results of chambers with *E. coli* O157:H7 primer set. Lane 3 show the results of chambers with *C. polykrikoides* primer set. Lane 4 show the results of chambers with *S. aureus* primer set.

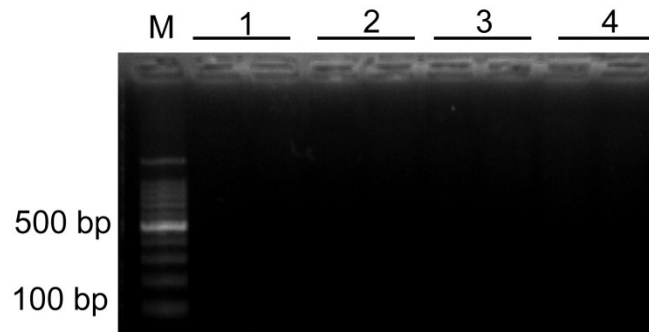

**Fig. S12** Gel electrophoresis results of LAMP reaction realized using the microdevice when the concentration of *Salmonella* spp. was  $1.7 \times 10^1$  CFU mL<sup>-1</sup>. Lane M shows 100 bp DNA ladder. Lane 1 show the results of chambers with *Salmonella* spp. primer set. Lane 2 show the results of chambers with *E. coli* O157:H7 primer set. Lane 3 show the results of chambers with *C. polykrikoides* primer set. Lane 4 show the results of chambers with *S. aureus* primer set.

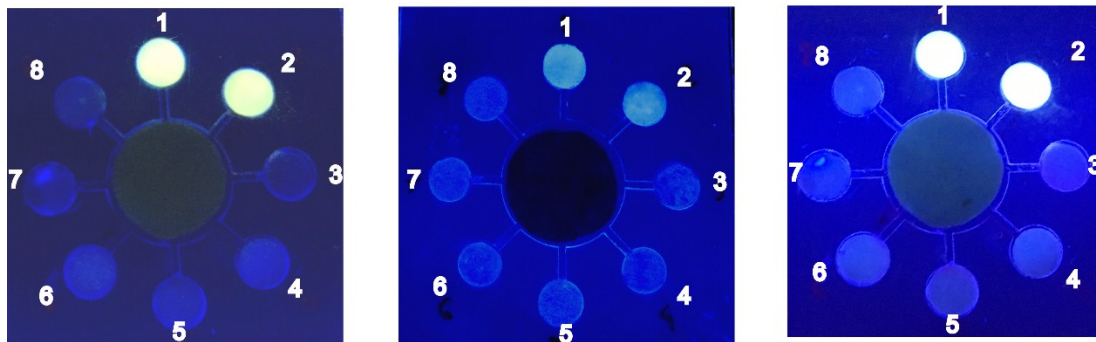

**Fig. S13** Fluorescence images taken directly from the microdevice for detecting *Salmonella* spp. at the concentration of  $1.7 \times 10^4$  CFU mL<sup>-1</sup>. Each analysis was repeated three times. Chambers 1 and 2 contained *Salmonella* spp. primer set. Chambers 3 and 4 contained *E. coli* O157:H7 primer set. Chambers 5 and 6 contained *C. polykrikoides* primer set. Chambers 7 and 8 contained *S. aureus* primer set.
